# Supplementary material for: Properdin Modulates Complement Component Production in Stressed Human Primary Retinal Pigment Epithelium Cells
Source: PubMed Central journal article supplement (PMC7555107; doi:10.3390/antiox9090793), 2020-08-26
Supplement: antioxidants-09-00793-s001.pdf [file antioxidants-09-00793-s001.pdf]

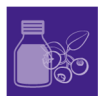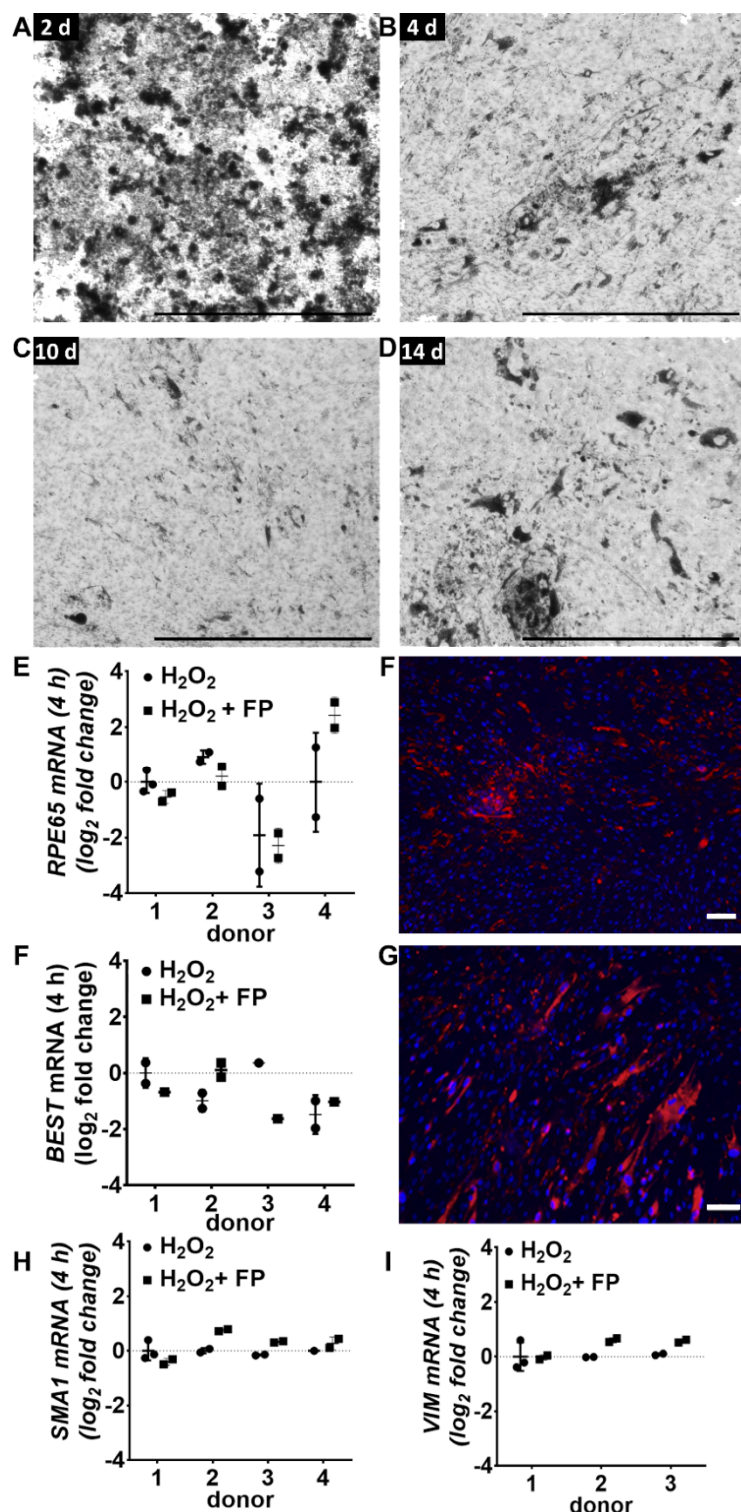

1  
2  
3  
4  
5  
6  
7  
8  
9

**Figure S1.** *Ex vivo* cultivated human hprPE cells show RPE-specific markers. (A–D) hprPE were pigmented and vital for 14 days on transwell filters. Shown are the cells of donor 2 at day (A) 2, (B) 4, (C) 10 and (D) 14 as an example. Scale bars 400  $\mu$ m. Magnification 10x. (E–F) hprPE were positive for (E) *RPE65* mRNA and (F) RPE65 protein in immunostainings. (G–H) hprPE were positive for (G) Bestrophin (*BEST*) mRNA and (H) bestrophin protein in immunostainings. (E, H) Shown are representative examples after 10 days in culture. Scale bars 100  $\mu$ m. Magnification 100x. (I, J) Marker for epithelial–mesenchymal transition (I) mRNA *SMA1* and (J) mRNA *VIM* were partly increased after properdin treatment of stressed hprPE cells.

10

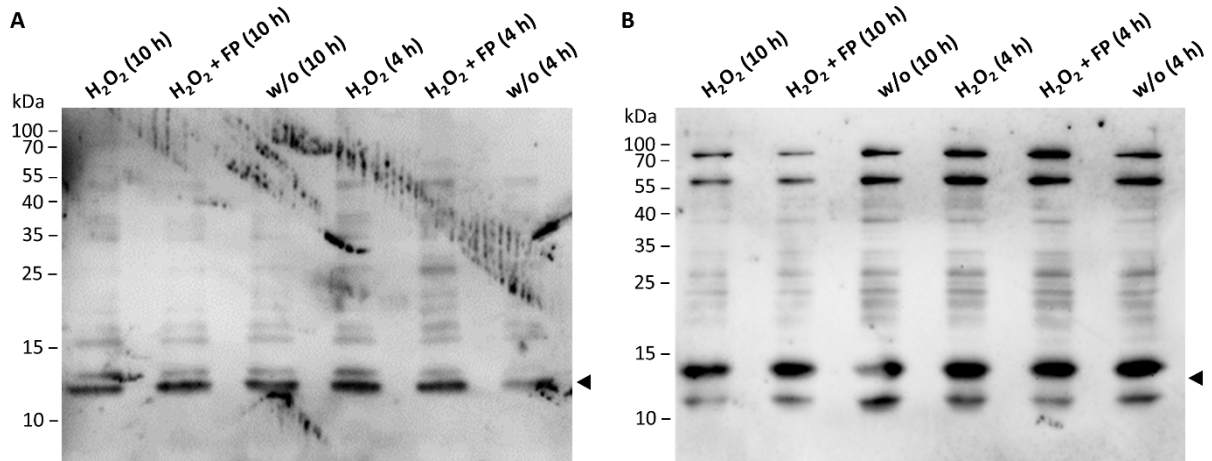

11

12

13

14

15

16

17

**Figure S2.** Western Blots of C3a and C5a in hpRPE cells. **(A)** C3a was detected in 5 h and 10 h stressed (H<sub>2</sub>O<sub>2</sub>, H<sub>2</sub>O<sub>2</sub> + FP) and unstressed (w/o) hpRPE cells at approx. 12 kDa (arrow). Exemplarily shown for donor 6. **(B)** C5a was detected as double band in 5 h and 10 h stressed (H<sub>2</sub>O<sub>2</sub>, H<sub>2</sub>O<sub>2</sub> + FP) and unstressed (w/o) hpRPE cells between 10 – 15 kDa (arrow). Exemplarily shown for donor 5. FP - properdin. Reduced conditions.

18

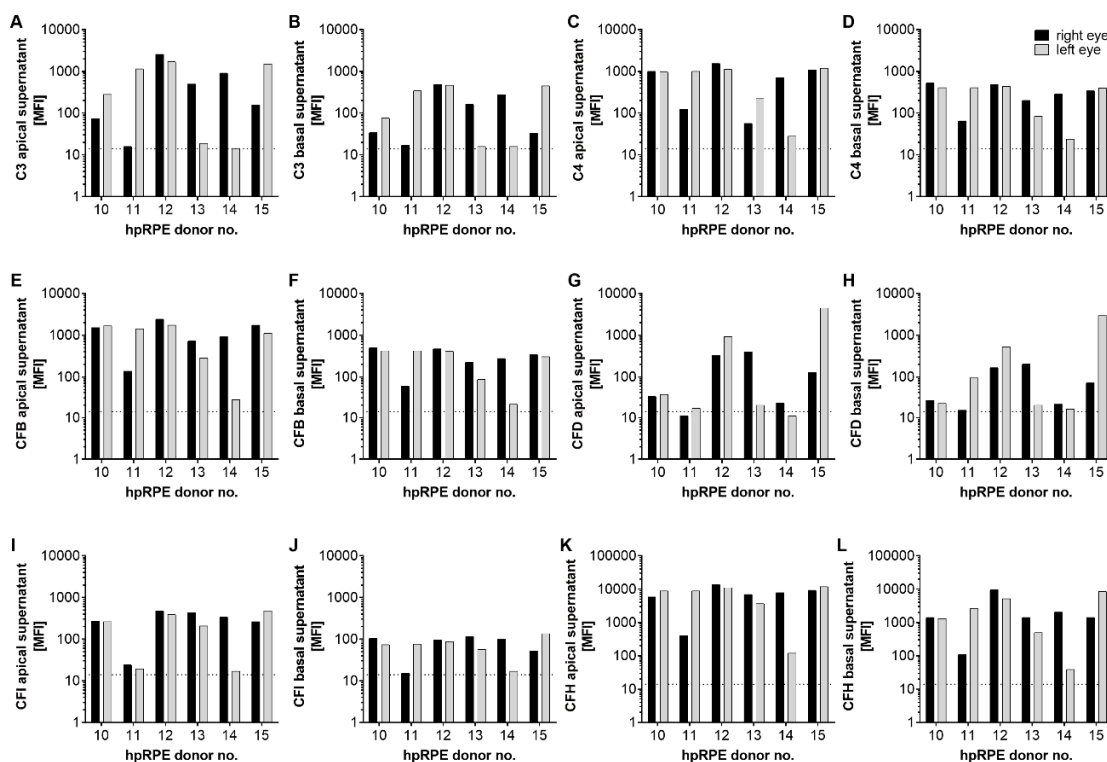

19

20

21

22

23

24

25

**Figure S3.** Complement component secretion is different in hpRPE cells from left and right donor eyes. Complement secretion of (A, B) C3, (C, D) C4, (E, F) CFB, (G, H) CFD, (I, J) CFI and (K, L) CFH was increased at the (A, C, E, G, I, K) apical compared to the (B, D, F, H, J, L) basal side. hpRPE isolated from the right eye (black) showed different complement component secretion activity than hpRPE from the left eye (grey). Dotted line shows blank control.

Table S1. In-house designed PCR primers.

| transcript      | gene accession number | name of sequence                                                 | application                                        |
|-----------------|-----------------------|------------------------------------------------------------------|----------------------------------------------------|
| <i>ARMS_375</i> | NG_011725             | fw: CATTCTAATATCAAATCAAACATTCAT<br>rv: CCTGGGGCTCTGTTTGAATTG     |                                                    |
| <i>C2_116</i>   | NG_011730             | fw: AGCACCATCTACACTTCGCC<br>rv: CATGGCCCTTACCTCGACAT             |                                                    |
| <i>C2_144</i>   | NG_011730             | fw: CAGGGGGAGATCAGAATCGTC<br>rv: GTGGGGGCAGGGAAATTCTTT           |                                                    |
| <i>C3_147</i>   | NG_009557             | fw: TTGCTCTCCTAAGCCTGTG<br>rv: GGCTAGGGTCTCACGAGG                |                                                    |
| <i>C3_223_2</i> | NG_009557             | fw: CTGGATGAAGAGGTACCCGC<br>rv: CTTGGAACAGACCCCTGACA             |                                                    |
| <i>C9_623</i>   | NG_009894             | fw: TCTGTGACAATGGCAGACAAT<br>rv: TTTATTCCCCACTCTCTGTTATCTT       |                                                    |
| <i>CFH_106</i>  | NG_007259             | fw: CCTTTGTTAGTAACTTTAGTTCGTCTT<br>rv: GGAGTAGGAGACCAGCCATTC     | hpRPE genotyping (2.2; Tab. 1)                     |
| <i>CFH_109</i>  | NG_007259             | fw: AGTCTACCTTGCTAACGGTTC<br>rv: CCTTCTAGATTGTAGTACCTGTTGCT      |                                                    |
| <i>CFH_121</i>  | NG_007259             | fw: CAGATCCGTGTGTAATATCCCGA<br>rv: TAAGAAGAGAGCCACCGGTCTCA       |                                                    |
| <i>CFH_570</i>  | NG_007259             | fw: AGTGGTGAGGAAAAATGTAGAATGT<br>rv: CATCTCCATCTTTCTTAAATTCTGTGA |                                                    |
| <i>CFH_618*</i> | NG_007259             | fw: GTGCATTACAGGGGCATATTC<br>rv: CCTGAAGACACAAATCTCACTGG         |                                                    |
| <i>CFI_100</i>  | NG_007569             | fw: CCTGCAGTGTGGTCTGTGAG<br>rv: CCAGTGCTACAAGGTGGGAA             |                                                    |
| <i>CFI_141</i>  | NG_007569             | fw: ATCCACTGATACAAGCGCTCA<br>rv: TTAAAATCGTCATGATGTTCAAAGC       |                                                    |
| <i>IL1B</i>     | NG_008851             | fw: CTCGCCAGTGAAATGATGGCT<br>rv: GTCGGAGATTCGTAGCTGGAT           | PCR (2.2/3; Fig. 5A) and RT-qPCR (2.3; Fig. 5B, C) |
| <i>SMA1</i>     | NG_006672             | fw: GCCTTGGTGTGTGACAATGG<br>rv: AAAACAGCCCTGGGAGCAT              | qPCR (2.3; Fig. S1)                                |
| <i>VIM</i>      | NG_012413             | fw: TGTCCAAATCGATGTGGATGTTTC<br>rv: TTGTACCATTCTTCTGCCTCCTG      |                                                    |

\*transcript refers to SNP *CFHR3/1\_618*

28  
29**Table S2** QuantiTect PrimerAssays (Qiagen)

| <b>mRNA transcript</b> | <b>gene accession number</b> | <b>PrimerAssay name</b> | <b>catalogue number</b> |
|------------------------|------------------------------|-------------------------|-------------------------|
| <i>GAPDH</i>           | NG_007073                    | Hs_GAPDH_1_SG           | QT00079247              |
| <i>C1Q</i>             | NG_007283                    | Hs_C1QB_1_SG            | QT00003493              |
| <i>C3</i>              | NG_009557                    | Hs_C3_1_SG              | QT00089698              |
| <i>C4A</i>             | NG_011638                    | Hs_C4A_1_SG             | QT00237160              |
| <i>C4B</i>             | NG_011639                    | Hs_C4B_1_SG             | QT00237167              |
| <i>C5</i>              | NG_007364                    | Hs_C5_1_SG              | QT00088011              |
| <i>CFB</i>             | NG_008191                    | Hs_BF_1_SG              | QT00012138              |
| <i>CFD</i>             | NG_007274                    | Hs_CFD_1_SG             | QT00212191              |
| <i>CFI</i>             | NG_007569                    | Hs_CFI_1_SG             | QT00213794              |
| <i>CFH</i>             | NG_007259                    | Hs_CFH_1_SG             | QT00001624              |
| <i>CFP</i>             | NG_009893                    | Hs_CFP_1_SG             | QT00010514              |
| <i>CD46</i>            | NG_009296                    | Hs_MCP_1_SG             | QT00073689              |
| <i>CD59</i>            | NG_008057                    | Hs_CD59_1_SG            | QT00035952              |
| <i>C3AR</i>            | NG_050736                    | Hs_C3AR1_1_SG           | QT00090398              |
| <i>C5AR1</i>           | NM_001736.4                  | Hs_C5R1_1_SG            | QT00997766              |
| <i>CD11B</i>           | NG_011719                    | Hs_ITGAM_1_SG           | QT00031500              |
| <i>NLRP3</i>           | NG_007509                    | Hs_NLRP3_1_SG           | QT00029771              |
| <i>RPE65</i>           | NG_008472                    | Hs_RPE65_1_SG           | QT00001351              |
| <i>BEST</i>            | NG_009033                    | Hs_BEST1_1_SG           | QT00023282              |

30
